# Supplementary material for: Anopheles mosquito exposure is associated with age, gender and bed net use in areas in Uganda experiencing varying malaria transmission intensity
Source: PubMed Central journal article supplement (PMC11661323; doi:10.1101/2024.12.12.24318757), 2024-12-13

A

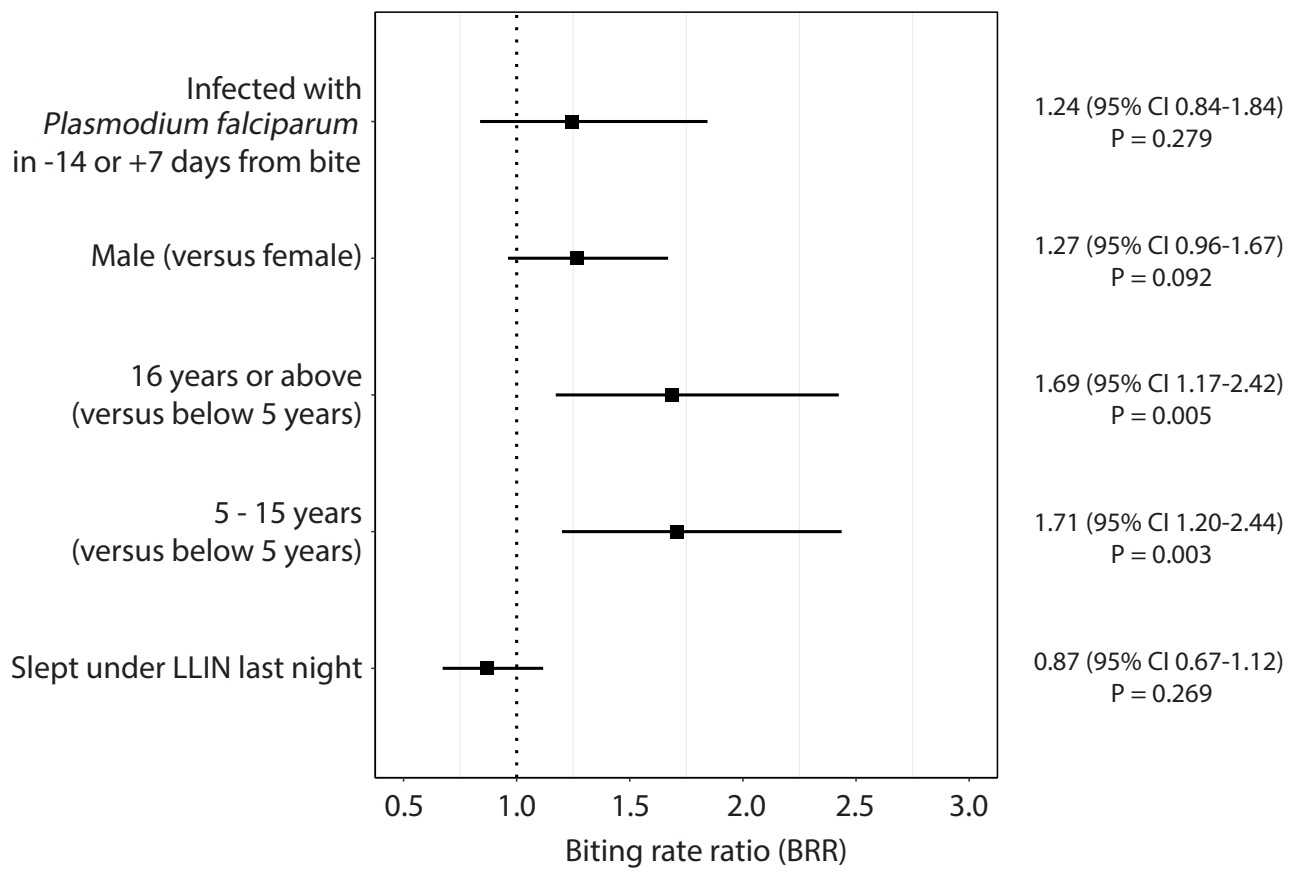

B

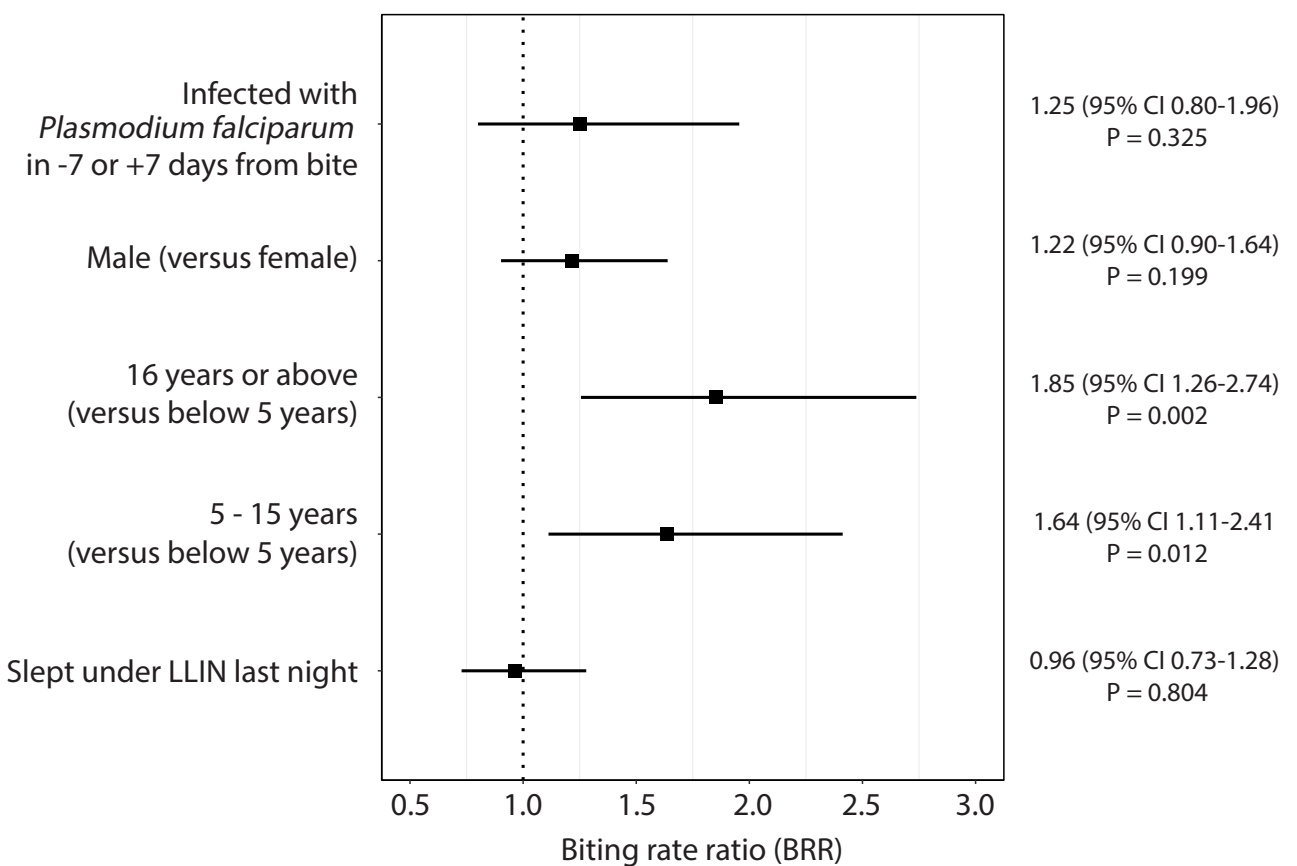

Supplement: media-6.pdf [file media-6.pdf]
